# Supplementary material
Source: PubMed Central journal article supplement (PMC5575966)
Supplement: NIHMS895326-supplement-Supplemental_tables_and_figures.pdf [file NIHMS895326-supplement-Supplemental_tables_and_figures.pdf]

## Supplemental Material

**Supplemental Table I:** Comparison of CTS participant characteristics for whom long-term physical activity data is available at two time points (1995-96 and 2005-06), compared to participants with long-term physical activity data at study enrollment (1995-96) only.

|                             | Participants with available LTPA data at enrollment (1995-96)<br>n = 120,814 | Participants with available LTPA data at follow-up (2005-06)<br>n = 61,256 | Participants without LTPA data at follow-up (2005-06)<br>n=59,558 |
|-----------------------------|------------------------------------------------------------------------------|----------------------------------------------------------------------------|-------------------------------------------------------------------|
| Age (years)                 | 53 (+/- 14)                                                                  | 52 (+/- 12)                                                                | 54 (+/- 16)                                                       |
| Race-ethnicity              |                                                                              |                                                                            |                                                                   |
| White                       | 104749 (87)                                                                  | 54023 (88)                                                                 | 50726 (85)                                                        |
| Black                       | 3212 (3)                                                                     | 1264 (2)                                                                   | 1948 (3)                                                          |
| Hispanic                    | 5028 (4)                                                                     | 2280 (4)                                                                   | 2748 (5)                                                          |
| Asian/Pacific Islander      | 4230 (4)                                                                     | 2250 (4)                                                                   | 1980 (3)                                                          |
| Other                       | 3595 (3)                                                                     | 1439 (2)                                                                   | 2156 (4)                                                          |
| SES                         |                                                                              |                                                                            |                                                                   |
| Below median                | 25523 (21)                                                                   | 11940 (19)                                                                 | 13583 (23)                                                        |
| Above median                | 93744 (78)                                                                   | 48591 (79)                                                                 | 45153 (76)                                                        |
| Hypertension                | 24912 (21)                                                                   | 11092 (18)                                                                 | 13820 (23)                                                        |
| Diabetes                    | 3335 (3)                                                                     | 1272 (2)                                                                   | 2063 (3)                                                          |
| Hyperlipidemia              | 1468 (1)                                                                     | 567 (1)                                                                    | 901 (2)                                                           |
| Body mass index (kg/m2)     |                                                                              |                                                                            |                                                                   |
| <20                         | 12590 (10)                                                                   | 6366 (10)                                                                  | 6224 (10)                                                         |
| 20-25                       | 57922 (48)                                                                   | 30434 (50)                                                                 | 27488 (46)                                                        |
| 25-30                       | 28862 (24)                                                                   | 14840 (24)                                                                 | 14022 (24)                                                        |
| 30+                         | 16258 (14)                                                                   | 7778 (13)                                                                  | 8480 (14)                                                         |
| Tobacco use                 |                                                                              |                                                                            |                                                                   |
| Current                     | 6102 (5)                                                                     | 2422 (4)                                                                   | 3680 (6)                                                          |
| Former                      | 34703 (29)                                                                   | 17667 (29)                                                                 | 17036 (29)                                                        |
| Never                       | 79328 (66)                                                                   | 40924 (67)                                                                 | 38404 (64)                                                        |
| Alcohol use                 |                                                                              |                                                                            |                                                                   |
| Current                     | 75952 (63)                                                                   | 40152 (66)                                                                 | 35800 (60)                                                        |
| Former                      | 14554 (12)                                                                   | 7125 (12)                                                                  | 7429 (12)                                                         |
| Never                       | 21773 (18)                                                                   | 10723 (18)                                                                 | 11050 (19)                                                        |
| Hormone replacement therapy |                                                                              |                                                                            |                                                                   |
| Current                     | 42632 (35)                                                                   | 23564 (39)                                                                 | 19068 (32)                                                        |
| Former                      | 14732 (12)                                                                   | 6646 (11)                                                                  | 8086 (14)                                                         |
| Never                       | 62921 (52)                                                                   | 30884 (50)                                                                 | 32037 (54)                                                        |

**Supplemental table II: Changes in physical activity pattern over time**

|                                                                    | Did not meet strenuous activity guidelines at follow up (n = 43970) | Met strenuous activity guidelines at follow up visit (n = 17286) |
|--------------------------------------------------------------------|---------------------------------------------------------------------|------------------------------------------------------------------|
| Did not meet moderate activity guidelines at follow up (n = 35474) | 27390                                                               | 8084                                                             |
| Met moderate activity guidelines at follow up (n = 25782)          | 16580                                                               | 9202                                                             |

**Supplemental Table III:** Risk association (hazard ratio and 95% confidence interval) of strenuous and/or moderate physical activity at study enrollment (1995-96) with total, ischemic, and hemorrhagic stroke and fatal stroke (adjusted for age, race, SES, tobacco use, alcohol use, body mass index, hypertension, diabetes, hyperlipidemia).

| Physical activity           | Total Stroke<br>(n = 3,973) | Ischemic stroke<br>(n = 2,808) | Hemorrhagic stroke<br>(n = 812) | Fatal stroke<br>(n = 1234) |
|-----------------------------|-----------------------------|--------------------------------|---------------------------------|----------------------------|
| Moderate activity           |                             |                                |                                 |                            |
| ≤150 mins/week              | 1.00 (ref)                  | 1.00 (ref)                     | 1.00 (ref)                      | 1.00 (ref)                 |
| >150 mins/week              | <b>0.90 (0.84-0.96)</b>     | <b>0.90 (0.83-0.98)</b>        | 0.96 (0.82-1.11)                | <b>0.88 (0.77-1.00)</b>    |
| Strenuous activity          |                             |                                |                                 |                            |
| ≤75 mins/week               | 1.00 (ref)                  | 1.00 (ref)                     | 1.00 (ref)                      | 1.00 (ref)                 |
| >75 mins/week               | 0.99 (0.92-1.07)            | 0.96 (0.88-1.06)               | 1.06 (0.90-1.24)                | 0.97 (0.84-1.11)           |
| Moderate/strenuous          |                             |                                |                                 |                            |
| Neither recommendations met | 1.00 (ref)                  | 1.00 (ref)                     | 1.00 (ref)                      | 1.00 (ref)                 |
| Either recommendation met   | <b>0.89 (0.84-0.95)</b>     | <b>0.88 (0.82-0.95)</b>        | 0.95 (0.82-1.09)                | <b>0.88 (0.78-0.99)</b>    |

**Supplemental Table IV:** Risk association (hazard ratio and 95% confidence interval) of change in strenuous and/or moderate physical activity using imputation for missing physical activity assessment at follow up with total, ischemic, and hemorrhagic stroke and fatal stroke (adjusted for age, race, SES, tobacco use, alcohol use, body mass index, hypertension, diabetes, hyperlipidemia).

| <b>Physical activity</b>      | <b>Total Stroke</b>     | <b>Ischemic stroke</b>  | <b>Hemorrhagic stroke</b> | <b>Fatal stroke</b> |
|-------------------------------|-------------------------|-------------------------|---------------------------|---------------------|
| Exercise pattern* - Moderate  |                         |                         |                           |                     |
| Not met Q1 - Not met Q4       | 1.00 (ref)              | 1.00 (ref)              | 1.00 (ref)                | 1.00 (ref)          |
| Not met Q1 - Met Q4           | <b>0.81 (0.70-0.94)</b> | <b>0.77 (0.64-0.93)</b> | 0.81 (0.56-1.17)          | 0.84 (0.62-1.15)    |
| Met Q1 - Not met Q4           | 0.97 (0.82-1.14)        | 0.96 (0.79-1.17)        | 1.01 (0.71-1.44)          | 1.01 (0.75-1.37)    |
| Met Q1 - Met Q4               | 0.88 (0.77-1.01)        | 0.86 (0.73-1.01)        | 0.95 (0.71-1.29)          | 0.83 (0.62-1.10)    |
| Exercise pattern* - Strenuous |                         |                         |                           |                     |
| Not met Q1 - Not met Q4       | 1.00 (ref)              | 1.00 (ref)              | 1.00 (ref)                | 1.00 (ref)          |
| Not met Q1 - Met Q4           | 1.03 (0.86-1.23)        | 0.98 (0.78-1.23)        | 0.99 (0.66-1.49)          | 1.14 (0.81-1.60)    |
| Met Q1 - Not met Q4           | 1.09 (0.93-1.28)        | 1.08 (0.91-1.31)        | 1.09 (0.80-1.53)          | 1.08 (0.80-1.48)    |
| Met Q1 - Met Q4               | 1.04 (0.88-1.23)        | 0.99 (0.81-1.21)        | 1.06 (0.76-1.47)          | 1.21 (0.89-1.64)    |
| Exercise pattern* - Stren+Mod |                         |                         |                           |                     |
| Not met Q1 - Not met Q4       | 1.00 (ref)              | 1.00 (ref)              | 1.00 (ref)                | 1.00 (ref)          |
| Not met Q1 - Met Q4           | 0.92 (0.77-1.11)        | 0.92 (0.77-1.11)        | 0.92 (0.77-1.11)          | 0.92 (0.77-1.11)    |
| Met Q1 - Not met Q4           | 0.98 (0.82-1.17)        | 0.98 (0.82-1.17)        | 0.98 (0.82-1.17)          | 0.98 (0.82-1.17)    |
| Met Q1 - Met Q4               | 0.92 (0.78-1.08)        | 0.92 (0.78-1.08)        | 0.92 (0.78-1.08)          | 0.92 (0.78-1.08)    |

\*Adjusted for age, race, socio-economic status, tobacco use, alcohol use, body-mass index, hypertension, diabetes, hyperlipidemia.

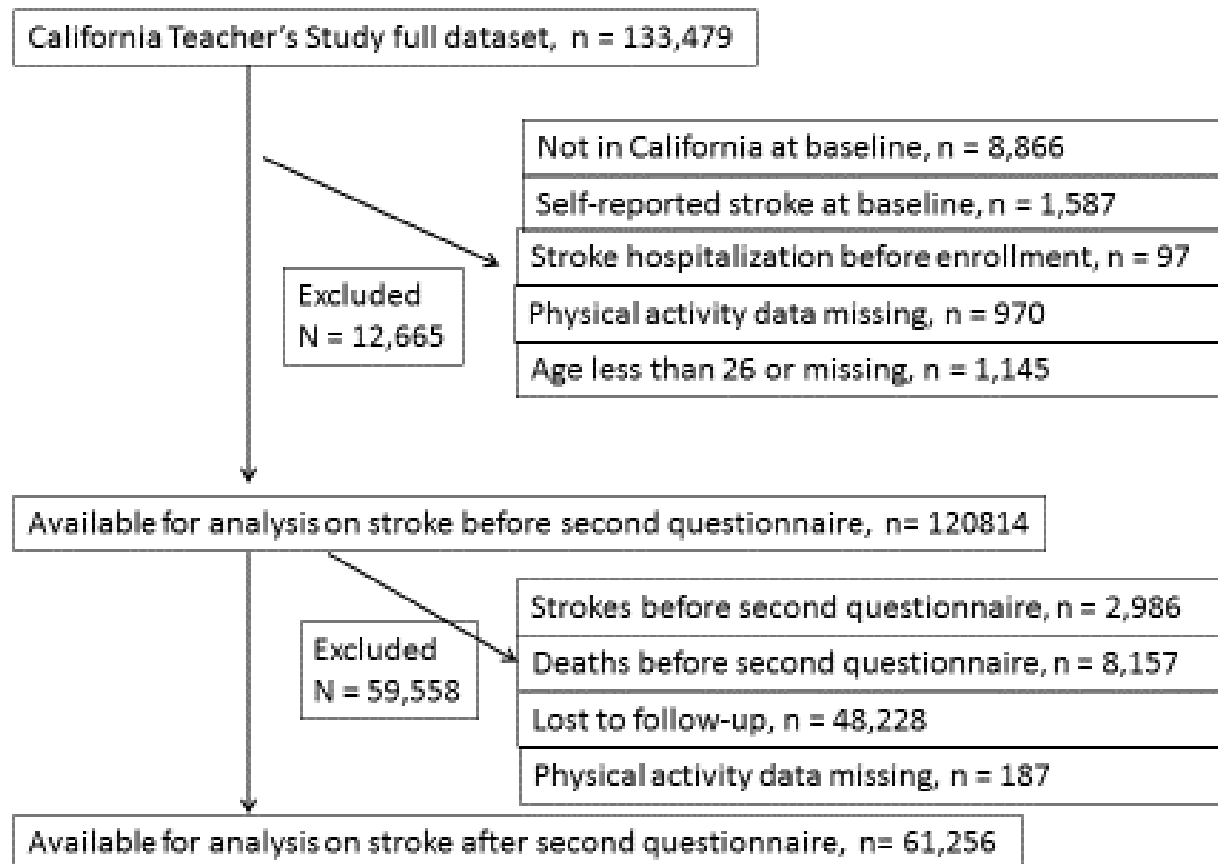

Supplemental figure I: study flow of the California Teachers Study
